# Supplementary material
Source: PubMed Central journal article supplement (PMC4356778)
Supplement: AAC.04149-14_zac004153816so1.pdf [file AAC.04149-14_zac004153816so1.pdf]

1 Supplemental Information: <sup>1</sup>H NMR Spectra of relevant ELQs

2

3 **ELQ-100:** <sup>1</sup>H NMR (400 MHz, DMSO-d<sub>6</sub>): δ 11.16 (s, 1H), 7.93 (d, *J* = 9.6 Hz,  
4 1H), 6.84-6.81 (m, 2H), 3.83 (s, 3H), 2.45-2.41 (m, 2H), 2.33 (s, 3H), 1.38-1.24  
5 (m, 10H), 0.87-0.84 (m, 3H).

6

7 **ELQ-109:** <sup>1</sup>H NMR (400 MHz, DMSO-d<sub>6</sub>) δ 11.42 (s, 1H), 8.04 (d, *J* = 8.7 Hz,  
8 1H), 7.49 (d, *J* = 2.0 Hz, 1H), 7.25 (dd, *J* = 8.7, 2.0 Hz, 1H), 2.49-2.44 (m, 2H),  
9 2.38 (s, 3H), 1.41-1.25 (m, 10H), 0.88-0.84 (m, 3H).

10

11 **ELQ-110:** <sup>1</sup>H NMR (400 MHz, DMSO-d<sub>6</sub>) δ 11.86 (s, 1H), 8.36 (d, *J* = 2.2 Hz,  
12 1H), 8.26 (d, *J* = 8.9 Hz, 1H), 7.99 (dd, *J* = 8.9, 2.2 Hz, 1H), 2.50-2.49 (m, 2H),  
13 2.44 (s, 3H), 1.43-1.25 (m, 10H), 0.88-0.85 (m, 3H).

14

15 **ELQ-118:** <sup>1</sup>H NMR (400 MHz, DMSO-d<sub>6</sub>) δ 8.17 (d, *J* = 7.94 Hz, 1H), 7.89 (d, *J* =  
16 1.22 Hz, 1H), 7.57 (dd, *J* = 7.94, 1.22 Hz, 1H), 2.48 (t), 2.47 (s, 3H), 1.2-1.4 (m,  
17 10H), 0.85 (t, *J* = 6.7 Hz, 3H).

18

19 **ELQ-120:** <sup>1</sup>H NMR (400 MHz, DMSO-d<sub>6</sub>) δ 11.4 (s, 1H), 8.08 (dd, *J* = 8.5, 6.1 Hz,  
20 1H), 7.17 (dd, *J* = 2.44, 10.37 Hz, 1H), 7.08 (ddd *J* = 8.5, 8.5, 2.44 Hz, 1H), 2.36  
21 (s, 1H), 2.45 (t, 2H), 1.2-1.4 (m, 10H), 0.85 (t, *J* = 2.3 Hz, 3H).

22

23 **ELQ-121:**  $^1\text{H}$  NMR (400 MHz, DMSO- $d_6$ ): 11.4 (bs, 0.85H), 7.0 (ddd,  $J = 10.0$ ,  
24 2.5, 1.4 Hz, 2H), 6.95 (ddd,  $J = 12.0, 10.0, 2.5$  Hz, 1H), 2.41 (dist. t, 2H), 2.33 (s,  
25 3H), 1.2–1.4 (m, 10H), 0.87 (t,  $J = 6.8$  Hz, 3H).

26

27 **ELQ-124:**  $^1\text{H}$  NMR (400 MHz, DMSO- $d_6$ ):  $\delta$  11.42 (s, 1H), 7.44 (d,  $J = 2.1$  Hz,  
28 1H), 7.27 (d,  $J = 2.0$  Hz, 1H), 2.42-2.39 (m, 2H), 2.33 (s, 3H), 1.39-1.23 (m, 10H),  
29 0.88-0.85 (m, 3H).

30

31 **ELQ-127:**  $^1\text{H}$  NMR (400 MHz, DMSO- $d_6$ ):  $\delta$  11.31 (s, 1H), 8.04 (dd,  $J = 8.0, 1.4$   
32 Hz, 1H), 7.56 (ddd,  $J = 8.0, 7.0, 1.6$  Hz, 1H), 7.45 (d,  $J = 8.0$  Hz, 1H), 7.23 (ddd,  
33  $J = 8.0, 7.0, 1.4$  Hz, 1H), 2.48 (m, 2H), 2.34 (s, 3H), 1.2-1.45 (m, 10H), 0.86 (s,  
34 3H).

35

36 **ELQ-130:**  $^1\text{H}$  NMR (400 MHz, DMSO- $d_6$ ):  $\delta$  11.54 (s, 1H), 7.97 (d,  $J = 2.4$  Hz,  
37 1H), 7.60 (dd,  $J = 8.8, 2.5$  Hz, 1H), 7.50 (d,  $J = 8.8$  Hz, 1H), 2.38 (s, 3H), 2.48  
38 (dist. t, 2H), 1.17–1.45 (m, 10H), 0.86 (t,  $J = 6.9$  Hz, 3H).

39

40 **ELQ-131:**  $^1\text{H}$  NMR (400 MHz, DMSO- $d_6$ ):  $\delta$  11.52 (s, 1H), 7.67 (dd,  $J = 9.5, 3.2$   
41 Hz, 1H), 7.55-7.45 (m, 2H), 2.49-2.45 (m, 2H), 2.38 (s, 3H), 1.40-1.24 (m, 10H),  
42 0.88-0.84 (m, 3H).

43

44 **ELQ-133:**  $^1\text{H}$  NMR (400 MHz, DMSO- $d_6$ ):  $\delta$  11.39 (s, 1H), 7.85 (d,  $J$  = 2.2 Hz,  
45 1H), 7.49 (dd,  $J$  = 8.8, 2.2 Hz, 1H), 7.42 (d,  $J$  = 8.6 Hz, 1H), 2.51 (s, 3H), 2.49-  
46 2.45 (m, 2H), 2.37 (s, 3H), 1.42-1.22 (m, 10H), 0.88-0.84 (m, 3H).

47

48 **ELQ-136:**  $^1\text{H}$  NMR (400 MHz, DMSO- $d_6$ ):  $\delta$  11.38 (s, 1H), 7.50 (td,  $J$  = 8.2, 5.3  
49 Hz, 1H), 7.25 (d,  $J$  = 8.4 Hz, 1H), 6.88 (ddd,  $J$  = 12.1, 8.0, 0.8 Hz, 1H), 3.18 (s,  
50 1H), 2.45-2.40 (m, 2H), 2.35 (s, 3H), 1.40-1.23 (m, 10H), 0.88-0.85 (m, 3H).

51

52 **ELQ-140:**  $^1\text{H}$  NMR (400 MHz, DMSO- $d_6$ ):  $\delta$  11.53 (s, 1H), 7.22 (ddd,  $J$  = 11.4,  
53 6.3, 1.8 Hz, 1H), 2.44-2.39 (m, 2H), 2.34 (s, 3H), 1.39-1.23 (m, 10H), 0.88-0.85  
54 (m, 3H).

55

56 **ELQ-141:**  $^1\text{H}$  NMR (400 MHz, DMSO- $d_6$ ):  $\delta$  11.60 (s, 1H), 7.25-7.18 (m, 4H),  
57 7.15-7.11 (m, 1H), 7.06-6.98 (m, 2H), 2.83 (s, 2H), 2.31 (s, 3H).

58

59 **ELQ-150:**  $^1\text{H}$  NMR (400 MHz, DMSO- $d_6$ ):  $\delta$  11.33 (s, 1H), 7.46 (d,  $J$  = 2.9 Hz,  
60 1H), 7.42 (d,  $J$  = 9.0 Hz, 1H), 7.21 (dd,  $J$  = 9.0, 2.9 Hz, 1H), 3.81 (s, 3H), 2.50-  
61 2.46 (m, 2H), 2.37 (s, 3H), 1.41-1.24 (m, 10H), 0.88-0.84 (m, 3H).

62

63 **ELQ-162:**  $^1\text{H}$  NMR (400 MHz, DMSO- $d_6$ ):  $\delta$  11.92 (s, 1H), 8.83 (d,  $J$  = 2.7 Hz,  
64 1H), 8.26 (dd,  $J$  = 9.2, 2.7 Hz, 1H), 7.64 (d,  $J$  = 9.2 Hz, 1H), 2.50-2.48 (m, 2H),  
65 2.42 (s, 3H), 1.44-1.23 (m, 10H), 0.88-0.85 (m, 3H).

66

67 **ELQ-200:**  $^1\text{H}$  NMR (400 MHz, DMSO- $d_6$ ):  $\delta$  11.54 (s, 1H), 7.97 (d,  $J$  = 2.3 Hz,  
68 1H), 7.60 (dd,  $J$  = 8.8, 2.3 Hz, 1H), 7.50 (d,  $J$  = 8.8 Hz, 1H), 2.50-2.46 (m, 2H),  
69 2.39 (s, 3H), 1.40-1.29 (m, 4H), 0.90 (t,  $J$  = 6.8 Hz, 3H).

70

71 **ELQ-220:**  $^1\text{H}$  NMR (400 MHz, DMSO- $d_6$ )  $\delta$  11.70 (s, 1H), 8.03 (d,  $J$  = 2.5 Hz,  
72 1H), 7.64 (dd,  $J$  = 8.8, 2.5 Hz, 1H), 7.54 (d,  $J$  = 8.8 Hz, 1H), 7.25-7.19 (m, 4H),  
73 7.15-7.11 (m, 1H), 3.90 (s, 2H), 2.36 (s, 3H).

74

75 **ELQ-269:**  $^1\text{H}$  NMR (400 MHz, DMSO- $d_6$ ):  $\delta$  11.87 (s, 1H), 8.04 (d,  $J$  = 2.5 Hz,  
76 1H), 7.74-7.68 (m, 5H), 7.60 (d,  $J$  = 9.0 Hz, 1H), 7.50 (tt,  $J$  = 7.4, 1.7 Hz, 2H),  
77 7.41-7.34 (m, 3H), 2.30 (s, 3H).

78

79 **ELQ-271:**  $^1\text{H}$  NMR (400 MHz, DMSO- $d_6$ )  $\delta$  11.65 (s, 1H), 8.09 (d,  $J$  = 7.2 Hz,  
80 1H), 7.64 (td,  $J$  = 7.6, 1.4 Hz, 1H), 7.54 (d,  $J$  = 8.1 Hz, 1H), 7.42 (d,  $J$  = 8.5 Hz,  
81 2H), 7.27-7.31 (m, 3H), 7.15-7.18 (m, 2H), 7.07-7.09 (m, 2H), 2.27 (s, 3H).

82

83 **ELQ-296:**  $^1\text{H}$  NMR (400 MHz, DMSO- $d_6$ )  $\delta$  11.85 (s, 1H), 8.00-8.03 (m, 1H),  
84 7.66-7.70 (m, 1H), 7.57-7.61 (m, 1H), 7.39-7.45 (m, 2H), 7.28-7.32 (m, 2H), 7.15-  
85 7.20 (m, 2H), 7.06-7.11 (m, 2H), 2.27 (s, 3H).

86

87 **ELQ-298:**  $^1\text{H}$  NMR (400 MHz, DMSO- $d_6$ )  $\delta$  11.65 (s, 1H), 8.09 (d,  $J = 7.2$  Hz,  
88 1H), 7.64 (td,  $J = 7.6, 1.4$  Hz, 1H), 7.54 (d,  $J = 8.1$  Hz, 1H), 7.42 (d,  $J = 8.5$  Hz,  
89 2H), 7.27-7.31 (m, 3H), 7.15-7.18 (m, 2H), 7.07-7.09 (m, 2H), 2.27 (s, 3H).

90

91 **ELQ-300:**  $^1\text{H}$  NMR (400 MHz,  $\text{CDCl}_3$ )  $\delta$  11.97 (s, 1H), 8.05 (s, 1H), 7.42 (d,  $J =$   
92 8.7 Hz, 2H), 7.29 (d,  $J = 8.3$  Hz, 2H), 7.17 (d,  $J = 8.3$  Hz, 2H), 7.12 (s, 1H), 7.08  
93 (d,  $J = 8.7$  Hz, 2H), 3.97 (s, 3H), 2.26 (s, 3H).

94

95 **ELQ-314:**  $^1\text{H}$  NMR (400 MHz, DMSO- $d_6$ )  $\delta$  11.83 (s, 1H), 7.71-7.74 (m, 1H), 7.62  
96 (dd,  $J = 9.1, 4.7$  Hz, 1H), 7.56 (td,  $J = 8.6, 3.0$  Hz, 1H), 7.42 (d,  $J = 8.5$  Hz, 2H),  
97 7.28-7.31 (m, 2H), 7.15-7.19 (m, 2H), 7.06-7.10 (m, 2H), 2.27 (s, 3H).

98

99 **ELQ-316:**  $^1\text{H}$  NMR (400 MHz, DMSO- $d_6$ )  $\delta$  11.78 (s, 1H), 7.69-7.74 (m, 1H),  
100 7.40-7.43 (m, 2H), 7.29 (d,  $J = 8.5$  Hz, 2H), 7.15-7.19 (m, 2H), 7.10-7.15 (m, 1H),  
101 7.06-7.09 (m, 2H), 3.96 (s, 3H), 2.25 (s, 3H).

102

103 **ELQ-317:**  $^1\text{H}$  NMR (400 MHz, DMSO- $d_6$ )  $\delta$  11.95 (s, 1H), 8.03 (dd,  $J = 8.9, 2.4$   
104 Hz, 2H), 7.80 (dd,  $J = 8.3, 4.1$  Hz, 1H), 7.69-7.72 (m, 1H), 7.61 (d,  $J = 8.9$  Hz,  
105 1H), 7.42-7.47 (m, 2H), 7.30-7.35 (m, 2H), 7.12-7.16 (m, 1H), 2.29 (s, 3H).

106

107 **ELQ-339:**  $^1\text{H}$  NMR (400 MHz, DMSO- $d_6$ )  $\delta$  8.16 (d,  $J = 2.4$  Hz, 1H), 7.72 (dd,  $J =$   
108 8.8, 2.4 Hz, 1H), 7.59 (d,  $J = 8.8$  Hz, 1H), 7.42 (dd,  $J = 9.0, 0.8$  Hz, 2H), 7.29 (dt,

109  $J = 8.7, 2.1$  Hz, 2H), 7.16 (dt,  $J = 9.1, 2.4$  Hz, 2H), 7.07 (dt,  $J = 8.7, 2.1$  Hz, 2H),  
110 2.26 (s, 3H).

111

112 **ELQ-340:**  $^1\text{H}$  NMR (400 MHz, DMSO- $d_6$ )  $\delta$  8.164 (s, 1H), 7.42 (d,  $J = 9.3, 0.9$  Hz,  
113 2H), 7.30-7.26 (m, 3H), 7.16 (dt,  $J = 9.2, 2.4$  Hz, 2H), 7.06 (dt,  $J = 8.7, 2.2$  Hz,  
114 2H), 3.93 (s, 3H), 1.65 (s, 3H).

115

116 **ELQ-400:**  $^1\text{H}$  NMR (400 MHz, DMSO- $d_6$ )  $\delta$  7.40 (d,  $J = 8.7$  Hz, 2H), 7.25 (d,  $J =$   
117 8.5 Hz, 2H), 7.20-6.92 (m, 6H), 2.19 (s, 3H).

118

119 **ELQ-404:**  $^1\text{H}$  NMR (400 MHz, DMSO- $d_6$ ):  $\delta$  11.83 (s, 1H), 7.43 (d,  $J = 8.9$  Hz,  
120 2H), 7.34-7.30 (m, 1H), 7.27 (dt,  $J = 8.7, 1.9$  Hz, 2H), 7.17 (dt,  $J = 8.1, 2.3$  Hz,  
121 2H), 7.08 (dt,  $J = 8.6, 2.0$  Hz, 2H), 2.22 (s, 3H).

122

123 **ELQ-428:**  $^1\text{H}$  NMR (400 MHz, DMSO- $d_6$ )  $\delta$  11.90 (s, 1H), 7.47-7.38 (m, 2H),  
124 7.33-7.23 (m, 3H), 7.20-7.13 (m, 2H), 7.12-7.05 (m, 2H), 2.22 (s, 3H).

125

126 **ELQ-429:**  $^1\text{H}$  NMR (400 MHz, DMSO- $d_6$ )  $\delta$  11.68 (s, 1H), 7.42 (d,  $J = 8.8$  Hz,  
127 2H), 7.26 (d,  $J = 8.5$  Hz, 2H), 7.19-7.15 (m, 3H), 7.08 (d,  $J = 8.5$  Hz, 2H), 3.90 (s,  
128 3H), 2.20 (s, 3H).

129

130
